# Supplementary material for: End Sequence Analysis Toolkit (ESAT) expands the extractable information from single-cell RNA-seq data
Source: Genome Res. 2016 Oct;26(10):1397–410. doi: 10.1101/gr.207902.116 (PMC5052061; doi:10.1101/gr.207902.116)
Supplement: Supplemental Material [file supp_gr.207902.116_Supplemental_Table_S1.xlsx]

## Sheet: 5' data
Sample	Input reads	Mapped	Multiple
5endDC_0h_rep1	17390657	15762083	3678948
5endDC_0h_rep2	14655644	13157190	3049791
5endDC_2h_rep1	15381952	13687394	3351792
5endDC_2h_rep2	17617983	15263282	3983630
5endDC_4h_rep1	14166928	12453683	3174092
5endDC_4h_rep2	18043555	15873282	4183965
total:	97256719	86196914	21422218
	aligned fraction:	0.886282
	fraction with multiple mappings:		0.248527

## Sheet: 3' data
Sample	Input reads	Mapped	Multiple
3endDC_0h_rep2	21175559	18359051	2909241
3endDC_2h_rep1	18714835	14899796	2394520
3endDC_2h_rep2	18922540	16757622	2677634
3endDC_4h_rep1	18492179	15837012	2836498
3endDC_4h_rep2	18283252	16332927	2594148
3endDC_6h_rep1	18222375	15920740	2664544
3endDC_6h_rep2	20078545	17816951	2760282
total:	133889285	115924099	18836867
	aligned fraction:	0.865821
	fraction with multiple mappings:		0.162493
