# Supplementary material for: End Sequence Analysis Toolkit (ESAT) expands the extractable information from single-cell RNA-seq data
Source: Genome Res. 2016 Oct;26(10):1397–410. doi: 10.1101/gr.207902.116 (PMC5052061; doi:10.1101/gr.207902.116)
Supplement: Supplemental Material [file supp_gr.207902.116_Supplemental_Table_S2.xlsx]

## Sheet: Rat SC data
# Healthy rat islet analysis using inDrops single-cell sequencing pipeline:
	Total sample reads:	156119813
	Valid cell barcode and UMI:	117165352	0.750484	of all reads
	cell barcode read threshold:	13000	(Barcodes with fewer than this threshold are discarded)
Tophat v2.0.9 results:	total mapped:	75068541	0.640706	of valid reads
	multimapped:	1806764
	uniquly mapped:	73261777
	total alignments:	77484014
	total valid cell barcodes:	1063	146867	average total reads per cell
	total barcode-filtered reads:	64784381	(after reads corresponding to low-count barcodes are removed)
ESAT results:
extension	multimapper handling	AT filter	recovered mm reads	assigned reads1	assigned UMIs2	mean reads/UMI	cells w/ >1k UMIs	non-zero genes	filtered genes3
0	ignore	off	0	45724496	6892575	6.63388	977	11327	6734
1000	ignore	off	0	48633534	7376528	6.59301	981	11793	7419
5000	ignore	off	0	50583697	7729656	6.54411	991	12180	8254	←parameters used for results presented in the paper
0	proper	off	474393	46198889	6949664	6.64764	978	11333	6749
1000	proper	off	623629	49257108	7450909	6.61089	982	11826	7458
5000	proper	off	651956	51234798	7819793	6.55194	991	12248	8321
0	ignore	10	0	45505530	6866847	6.62684	977	11319	6710
1000	ignore	10	0	48384862	7347631	6.5851	981	11782	7384
5000	ignore	10	0	50268818	7694422	6.53315	991	12171	8222
0	proper	10	471658	45977188	6923090	6.64114	977	11326	6724
1000	proper	10	620738	49005545	7421264	6.6034	981	11816	7421
5000	proper	10	648124	50916115	7783719	6.54136	991	12238	8288
				1 reads assigned to genes/transcripts
				2 unique UMIs assigned to genes/transcripts
				3 genes with at least 2 UMIs in at least 3 cells

## Sheet: Mouse DC data
# Mouse DC data, 5' and 3' libraries:
Aligned reads:
3' samples:
0h rep2	23734802
2h rep1	21280390
2h rep2	21152751
4h rep1	21979997
4h rep2	20600849
6h rep1	20531408
6h rep2	22768886	152049083	3' total
5' samples:
0h rep1	14195746
0h rep2	11520327
2h rep1	11959955
2h rep2	12726765
4h rep1	10432129
4h rep2	13431198	74266120	5' total
Library end	multimapper handling	AT filter	extension	total assigned reads	recovered mm reads	non-zero genes	% reads assigned
3'	ignore	off	0	85377821	0	15996	0.561515
3'	ignore	off	1000	86936158	0	16492	0.571764
3'	ignore	off	5000	88038411	0	17814	0.579013
3'	ignore	10	0	84708002	0	15911	0.55711
3'	ignore	10	1000	86247809	0	16362	0.567237
3'	ignore	10	5000	87317378	0	17571	0.574271
3'	proper	off	0	86384821	1007000	16049	0.568138
3'	proper	off	1000	88021226	1085068	17217	0.5789
3'	proper	off	5000	89094504	1056093	19350	0.585959
3'	proper	10	0	85695809	987807	15949	0.563606
3'	proper	10	1000	87298743	1050934	17020	0.574148
3'	proper	10	5000	88270536	953158	19144	0.58054
5'	ignore	off	0	41149345	0	15673	0.55408
5'	ignore	off	1000	44262397	0	16081	0.595997
5'	ignore	off	5000	44421650	0	16942	0.598142
5'	ignore	10	0	41039211	0	15581	0.552597
5'	ignore	10	1000	44150080	0	15988	0.594485
5'	ignore	10	5000	44306843	0	16814	0.596596
5'	proper	off	0	41498549	349204	15722	0.558782
5'	proper	off	1000	45099923	837526	16523	0.607275
5'	proper	off	5000	45197899	776249	18394	0.608594
5'	proper	10	0	41386857	347646	15622	0.557278
5'	proper	10	1000	44984320	834240	16377	0.605718
5'	proper	10	5000	45077002	770159	18191	0.606966
