# Supplementary material for: End Sequence Analysis Toolkit (ESAT) expands the extractable information from single-cell RNA-seq data
Source: Genome Res. 2016 Oct;26(10):1397–410. doi: 10.1101/gr.207902.116 (PMC5052061; doi:10.1101/gr.207902.116)
Supplement: Supplemental Material [file supp_gr.207902.116_Supplemental_Table_S3.xlsx]

## Sheet: GO enrichment genes in Figure 6
row	gene	group	Source	Category	nGenes	pValue	Benjamini	notes
1	Actb	1	GOTERM_BP_FAT	feeding behavior	5	2e-05	0.014
2	Actg1	1
3	Hsp90ab1	1
4	Psap	1
5	Ddx5	1
6	Cfl1	1
7	Calm1	1
8	Tmsb10	1
9	Clic1	1
10	Itm2b	1
11	Cst3	1
12	Igfbp7	1
13	Tuba1b	1
14	Tuba1a	1
15	Dynll1	1
16	Myl6l	1
17	Myl6	1
18	Myl6b	1
19	Gng5	1
20	Ppia	1
21	B2m	1
22	Pfn1	1
23	Sdcbp	1
24	Rnaset2	1
25	Gstp1	1
26	Aplp2	1
27	App	1
28	Sft2d1	1
29	Pyy	1
30	Ppy	1
31	Agt	1
32	Ace2	1
33	S100a11	1
34	Itm2a	1
35	Gpx1	1
36	Psme1	1
37	Zfp36l2	1
38	RT1-CE10	1
39	Gas6	1
40	Sptbn1	1
41	Mcl1	1
42	Grem1	1
43	Sept7	1
44	Etv1	2	GOTERM_MF_FAT	translation factor activity, nucleic acid binding	7	1e-05	0.0024
45	Rbp4	2	GOTERM_MF_FAT	translation elongation factor activity	4	0.00053	0.061
46	Arsb	2
47	Tmem59l	2
48	Tmsb4x	2
49	Igfbp4	2
50	Arx	2
51	Qsox1	2
52	Fev	2
53	Cited2	2
54	Higd1a	2
55	Gcg	2
56	Gnas	2
57	Tmsbl1	2
58	Irx2	2
59	Mafb	2
60	Gls	2
61	Ctsh	2
62	Serping1	2
63	Gfpt2	2
64	Hspa1b	2
65	Marcks	2
66	Pbx1	2
67	Oaz1	2
68	Basp1	2
69	Ypel3	2
70	Eef1a1	2
71	Tpt1	2
72	Uba52	2
73	Fau	2
74	Gnb2l1	2
75	Npm1	2
76	Eef1b2	2
77	Eef1g	2
78	Npc2	2
79	H3f3b	2
80	Ywhae	2
81	Eif1	2
82	Btf3	2
83	Aes	2
84	Tbca	2
85	Ly6e	2
86	Sepp1	2
87	Cst6	2
88	Hnrnpa3	2
89	Eif4a2	2
90	Isl1	2
91	Rbbp7	2
92	Rgs4	2
93	Gch1	2
94	Kcnk16	2
95	Clu	2
96	Mageh1	2
97	Gc	2
98	Spint2	2
99	Pcsk2	2
100	Pcsk1n	2
101	Resp18	2
102	Tmem27	2
103	Scg5	2
104	Ctsb	2
105	Hmgn2	2
106	Chgb	2
107	Pcbd1	2
108	Gpx3	2
109	Uchl1	2
110	Epcam	2
111	Glud1	2
112	Rph3al	2
113	Hmgb1	2
114	Ywhag	2
115	Wbp2	2
116	Dap	2
117	Ndufb11	2
118	LOC688869	2
119	Bsg	2
120	Txn1	2
121	Capns1	2
122	Vdac2	2
123	Vdac3	2
124	Shfm1	2
125	Serbp1	2
126	Glo1	2
127	Cox4i1	2
128	Eif4b	2
129	Lamp1	2
130	Eef2	2
131	Scp2	2
132	Nono	2
133	LOC100911576	2
134	Celf3	2
135	Ucp2	2
136	Kcnk3	2
137	Ldlr	2
138	Mbnl2	2
139	Zfp36l1	3	GOTERM_BP_FAT	vasculature development	29	1.4e-21	1.9e-18
140	Tgfbr2	3	GOTERM_BP_FAT	blood vessel development	28	9.3e-21	6.6e-18
141	Msn	3	GOTERM_BP_FAT	blood vessel morphogenesis	26	1e-20	4.8e-18
142	Fxyd5	3	GOTERM_BP_FAT	angiogenesis	21	2.1e-18	7.5e-16
143	Vim	3	GOTERM_BP_FAT	regulation of cell motion	22	6.1e-16	1.6e-13
144	Ldha	3	GOTERM_BP_FAT	regulation of cell migration	20	1.2e-14	2.9e-12
145	Cxcr4	3	GOTERM_BP_FAT	regulation of locomotion	20	1.4e-13	2.8e-11
146	Cd48	3	GOTERM_BP_FAT	regulation of cell proliferation	30	7.8e-11	1.4e-08
147	Srgn	3	GOTERM_BP_FAT	biological adhesion	24	8e-10	1.3e-07
148	Ehd4	3	GOTERM_BP_FAT	cell adhesion	24	8e-10	1.3e-07
149	Sema7a	3	GOTERM_BP_FAT	regulation of response to external stimulus	15	2e-09	2.8e-07
150	LOC500300	3	GOTERM_BP_FAT	patterning of blood vessels	8	2.2e-09	2.9e-07
151	Esm1	3	GOTERM_BP_FAT	positive regulation of cell motion	12	9.9e-09	1.2e-06
152	Cyyr1	3	GOTERM_BP_FAT	tube development	17	1e-08	1.1e-06
153	Dll4	3	GOTERM_BP_FAT	cell migration	17	1.9e-08	1.9e-06
154	Mgll	3	GOTERM_BP_FAT	positive regulation of cell migration	11	5.4e-08	5.1e-06
155	S1pr1	3	GOTERM_BP_FAT	localization of cell	18	8.4e-08	7.4e-06
156	Eltd1	3	GOTERM_BP_FAT	cell motility	18	8.4e-08	7.4e-06
157	Plxnd1	3	GOTERM_BP_FAT	cell motion	20	1.1e-07	8.8e-06
158	Flt4	3	GOTERM_BP_FAT	response to hypoxia	14	1.4e-07	1.1e-05
159	Flt1	3	GOTERM_BP_FAT	positive regulation of locomotion	11	1.4e-07	1.1e-05
160	Clec14a	3	GOTERM_BP_FAT	vasculogenesis	8	2.1e-07	1.5e-05
161	Cd93	3	GOTERM_BP_FAT	regulation of angiogenesis	9	2.4e-07	1.6e-05
162	Pecam1	3	GOTERM_BP_FAT	epithelial cell differentiation	11	2.7e-07	1.7e-05
163	Emcn	3	GOTERM_BP_FAT	response to oxygen levels	14	2.9e-07	1.8e-05
164	Tie1	3	GOTERM_BP_FAT	morphogenesis of a branching structure	11	4.5e-07	2.6e-05
165	Kdr	3	GOTERM_BP_FAT	regulation of chemotaxis	7	6.9e-07	3.9e-05
166	Podxl	3	GOTERM_BP_FAT	negative regulation of cell migration	8	1.5e-06	8.3e-05
167	Vwa1	3	GOTERM_BP_FAT	enzyme linked receptor protein signaling pathway	15	2e-06	0.0001
168	Rgcc	3	GOTERM_BP_FAT	regulation of cell growth	12	2.1e-06	0.00011
169	Tmem204	3	GOTERM_BP_FAT	epithelium development	14	2.4e-06	0.00011
170	Col15a1	3	GOTERM_BP_FAT	negative regulation of locomotion	8	2.5e-06	0.00012
171	Sox18	3	GOTERM_BP_FAT	negative regulation of cell motion	8	2.8e-06	0.00013
172	Rasip1	3	GOTERM_BP_FAT	wound healing	12	2.8e-06	0.00013
173	Ptprg	3	GOTERM_BP_FAT	branching morphogenesis of a tube	9	3.3e-06	0.00014
174	Plat	3	GOTERM_BP_FAT	vascular endothelial growth factor receptor signaling pathway	5	4.1e-06	0.00017
175	Dab2	3	GOTERM_BP_FAT	regulation of smooth muscle cell proliferation	8	4.5e-06	0.00018
176	Col18a1	3	GOTERM_BP_FAT	endothelial cell differentiation	5	6.1e-06	0.00024
177	F2rl1	3	GOTERM_BP_FAT	tube morphogenesis	11	6.8e-06	0.00026
178	Cxcl12	3	GOTERM_BP_FAT	positive regulation of chemotaxis	6	9.2e-06	0.00034
179	Notch4	3	GOTERM_BP_FAT	regulation of behavior	7	2.2e-05	0.00079
180	Sparcl1	3	GOTERM_BP_FAT	positive regulation of behavior	6	3e-05	0.0011
181	Mcam	3	GOTERM_BP_FAT	transmembrane receptor protein serine/threonine kinase signaling pathway	8	3.1e-05	0.0011
182	Tm4sf1	3	GOTERM_BP_FAT	positive regulation of developmental process	14	3.2e-05	0.0011
183	Ptn	3	GOTERM_BP_FAT	response to organic substance	25	5.2e-05	0.0017
184	Ednrb	3	GOTERM_BP_FAT	response to steroid hormone stimulus	13	7.4e-05	0.0024
185	Apold1	3	GOTERM_BP_FAT	cell morphogenesis	14	8e-05	0.0025
186	Fzd4	3	GOTERM_BP_FAT	positive regulation of response to external stimulus	7	8.4e-05	0.0026
187	Eng	3	GOTERM_BP_FAT	regulation of growth	13	9.3e-05	0.0028
188	Plvap	3	GOTERM_BP_FAT	response to hormone stimulus	17	0.00012	0.0036
189	Cyr61	3	GOTERM_BP_FAT	cell-cell adhesion	11	0.00013	0.0038
190	Cav1	3	GOTERM_BP_FAT	cell-substrate adhesion	7	0.00014	0.0038
191	Esam	3	GOTERM_BP_FAT	response to endogenous stimulus	18	0.00015	0.0041
192	Htra1	3	GOTERM_BP_FAT	response to peptide hormone stimulus	11	0.00015	0.004
193	Akap2	3	GOTERM_BP_FAT	epithelial cell development	5	0.00016	0.0044
194	Nrp1	3	GOTERM_BP_FAT	Rho protein signal transduction	5	0.00016	0.0044
195	Tek	3	GOTERM_BP_FAT	lung development	8	0.00019	0.0049
196	Gata2	3	GOTERM_BP_FAT	response to estrogen stimulus	9	0.0002	0.0052
197	Lmcd1	3	GOTERM_BP_FAT	respiratory tube development	8	0.00021	0.0053
198	Cdh5	3	GOTERM_BP_FAT	cellular component morphogenesis	14	0.00022	0.0054
199	Sdpr	3	GOTERM_BP_FAT	positive regulation of angiogenesis	5	0.00022	0.0054
200	Icam2	3	GOTERM_BP_FAT	respiratory system development	8	0.00028	0.0066
201	Hspb1	3	GOTERM_BP_FAT	positive regulation of cell proliferation	14	0.00029	0.0069
202	Fscn1	3	GOTERM_BP_FAT	endothelial cell morphogenesis	3	0.00035	0.008
203	RT1-T24-3	3	GOTERM_BP_FAT	leukocyte migration	6	0.00037	0.0084
204	Nid2	3	GOTERM_BP_FAT	negative regulation of cell proliferation	11	0.00059	0.013
205	Dysf	3	GOTERM_BP_FAT	response to wounding	14	0.00068	0.015
206	Itga1	3	GOTERM_BP_FAT	regulation of cell size	9	0.0009	0.019
207	S100a16	3	GOTERM_BP_FAT	positive regulation of positive chemotaxis	4	0.0009	0.019
208	Lrg1	3	GOTERM_BP_FAT	regulation of positive chemotaxis	4	0.0009	0.019
209	Gja1	3	GOTERM_BP_FAT	regulation of cellular component size	10	0.00091	0.019
210	Slc9a3r2	3	GOTERM_BP_FAT	regulation of programmed cell death	18	0.0012	0.024
211	LOC684871	3	GOTERM_BP_FAT	positive regulation of smooth muscle cell proliferation	5	0.0012	0.024
212	Gpr116	3	GOTERM_BP_FAT	regulation of cell death	18	0.0012	0.024
213	Vwf	3	GOTERM_BP_FAT	transmembrane receptor protein tyrosine kinase signaling pathway	9	0.0012	0.024
214	Nos3	3	GOTERM_BP_FAT	cell morphogenesis involved in differentiation	10	0.0013	0.025
215	Fabp4	3	GOTERM_BP_FAT	response to mechanical stimulus	6	0.0015	0.028
216	Jam2	3	GOTERM_BP_FAT	response to extracellular stimulus	11	0.0016	0.031
217	Klf2	3	GOTERM_BP_FAT	response to nutrient	9	0.0018	0.033
218	Ramp3	3	GOTERM_BP_FAT	positive regulation of cell growth	5	0.0019	0.035
219	Rras	3	GOTERM_BP_FAT	regulation of metal ion transport	6	0.0023	0.041
220	Plxna2	3	GOTERM_BP_FAT	endothelial cell development	3	0.0024	0.042
221	Col4a1	3	GOTERM_BP_FAT	regulation of apoptosis	17	0.0026	0.046
222	Ifitm3	3	GOTERM_BP_FAT	extracellular matrix organization	6	0.0026	0.046
223	Timp3	3	GOTERM_BP_FAT	positive regulation of cell size	5	0.0027	0.047
224	Sparc	3	GOTERM_BP_FAT	regulation of cell morphogenesis	7	0.0028	0.047
225	Fstl1	3	GOTERM_BP_FAT	positive regulation of growth	6	0.0028	0.046
226	Prkcdbp	3	GOTERM_BP_FAT	response to drug	11	0.0029	0.048
227	Emp1	3	GOTERM_BP_FAT	regulation of blood coagulation	4	0.003	0.049
228	Tril	3
229	Anxa2	3	GOTERM_MF_FAT	growth factor binding	14	2.9e-12	7.9e-10
230	Ahnak	3	GOTERM_MF_FAT	vascular endothelial growth factor receptor activity	4	3.1e-05	0.0043
231	Crip2	3	GOTERM_MF_FAT	identical protein binding	17	0.00019	0.017
232	Dlc1	3	GOTERM_MF_FAT	actin binding	10	0.00046	0.031
233	Serpinh1	3	GOTERM_MF_FAT	calcium ion binding	17	0.00082	0.044
234	Tns1	3
235	Gng11	3	EGG_PATHWAY	Focal adhesion	12	1.6e-05	0.0011
236	Cxcr7	3	KEGG_PATHWAY	ECM-receptor interaction	7	0.00038	0.013
237	Cd36	3
238	Arpc1b	3
239	Rhoj	3
240	Gpihbp1	3
241	Aplnr	3
242	Atf3	3
243	Nr4a1	3
244	Sgk1	3
245	Klf6	3
246	Elk3	3
247	Lamc1	3
248	Myl12a	3
249	Anxa1	3
250	Rnase4	3
251	Ifitm1	3
252	Pnp	3
253	Csrp1	3
254	Hip1	3
255	Adam17	3
256	Clec2g	3
257	Sh3bp5	3
258	Bst2	3
259	Jam3	3
260	Itga6	3
261	Jup	3
262	Klf4	3
263	Cdc42ep1	3
264	Col13a1	3
265	Nfib	3
266	Id3	3
267	Id1	3
268	Egfl7	3
269	Calcrl	3
270	Erg	3
271	Pianp	3
272	Plk2	3
273	Eva1b	3
274	Bmpr2	3
275	Zfp36	3
276	Nfkbia	3
277	Cxcl16	3
278	Ier3	3
279	Flna	3
280	Ets1	3
281	Il2rg	3
282	Rbms1	3
283	Pdgfb	3
284	Tax1bp3	3
285	Cnn3	3
286	Unc5b	3
287	Clic5	3
288	Stc1	3
289	Tmem255b	3
290	Tcf4	3
291	Smurf2	3
292	Spry4	3
293	Igfbp3	3
294	Clic4	3
295	Pls3	3
296	Ppap2a	3
297	Epas1	3
298	Thbs1	3
299	Ppap2b	3	NOTE: all highlighted enrichment categories correspond to subgroup 3a (heatmap rows 300-307)
300	Dusp1	3a	GOTERM_BP_FAT	response to cAMP	4	2.8e-06	0.00071
301	Ier2	3a	GOTERM_BP_FAT	response to mechanical stimulus	4	4.9e-06	0.00062
302	Jun	3a	GOTERM_BP_FAT	response to organic substance	6	1.5e-05	0.0012
303	Fos	3a	GOTERM_BP_FAT	response to abiotic stimulus	5	1.7e-05	0.0011
304	Btg2	3a	GOTERM_BP_FAT	response to organic cyclic substance	4	0.0001	0.0051
305	Rhob	3a	GOTERM_BP_FAT	transcription	5	0.00014	0.0058
306	Junb	3a	GOTERM_BP_FAT	positive regulation of transcription from RNA polymerase II promoter	4	0.00059	0.021
307	Egr1	3a	GOTERM_BP_FAT	response to reactive oxygen species	3	0.00084	0.026
308	Lrrc8a	3	GOTERM_BP_FAT	transcription from RNA polymerase II promoter	3	0.00092	0.025
309	Serinc3	3	GOTERM_BP_FAT	positive regulation of transcription, DNA-dependent	4	0.00098	0.024
310	Tmem150c	3	GOTERM_BP_FAT	positive regulation of RNA metabolic process	4	0.001	0.023
311	Ramp2	3	GOTERM_BP_FAT	response to cytokine stimulus	3	0.0012	0.026
312	Vamp5	3	GOTERM_BP_FAT	response to hormone stimulus	4	0.0014	0.026
313	Sh2d3c	3	GOTERM_BP_FAT	response to light stimulus	3	0.0014	0.025
314	Rasgrp3	3	GOTERM_BP_FAT	response to glucocorticoid stimulus	3	0.0015	0.025
315	Cd200	3	GOTERM_BP_FAT	positive regulation of transcription	4	0.0015	0.024
			GOTERM_BP_FAT	positive regulation of gene expression	4	0.0017	0.024
			GOTERM_BP_FAT	response to corticosteroid stimulus	3	0.0017	0.024
			GOTERM_BP_FAT	learning or memory	3	0.0017	0.023
			GOTERM_BP_FAT	response to endogenous stimulus	4	0.0019	0.024
			GOTERM_BP_FAT	transcription, DNA-dependent	3	0.002	0.023
			GOTERM_BP_FAT	cellular response to hormone stimulus	3	0.002	0.023
			GOTERM_BP_FAT	RNA biosynthetic process	3	0.002	0.023
			GOTERM_BP_FAT	regulation of transcription from RNA polymerase II promoter	4	0.0022	0.024
			GOTERM_BP_FAT	positive regulation of nucleobase, nucleoside, nucleotide and nucleic acid metabolic process	4	0.0023	0.024
			GOTERM_BP_FAT	positive regulation of nitrogen compound metabolic process	4	0.0025	0.025
			GOTERM_BP_FAT	positive regulation of macromolecule biosynthetic process	4	0.0025	0.024
			GOTERM_BP_FAT	SMAD protein signal transduction	2	0.0025	0.023
			GOTERM_BP_FAT	positive regulation of cellular biosynthetic process	4	0.0029	0.026
			GOTERM_BP_FAT	positive regulation of biosynthetic process	4	0.0031	0.026
			GOTERM_BP_FAT	response to oxidative stress	3	0.0033	0.027
			GOTERM_BP_FAT	blood vessel morphogenesis	3	0.0034	0.027
			GOTERM_BP_FAT	response to radiation	3	0.0036	0.028
			GOTERM_BP_FAT	regulation of transcription	5	0.0037	0.028
			GOTERM_BP_FAT	blood vessel development	3	0.0051	0.038
			GOTERM_BP_FAT	positive regulation of macromolecule metabolic process	4	0.0054	0.038
			GOTERM_BP_FAT	vasculature development	3	0.0054	0.038
			GOTERM_BP_FAT	regulation of cell cycle	3	0.0059	0.04
			GOTERM_BP_FAT	response to inorganic substance	3	0.0069	0.045
			GOTERM_MF_FAT	double-stranded DNA binding	4	5.3e-06	0.00023
			GOTERM_MF_FAT	structure-specific DNA binding	4	1.7e-05	0.00037
			GOTERM_MF_FAT	sequence-specific DNA binding	4	0.00069	0.01
			GOTERM_MF_FAT	transcription factor activity	4	0.0014	0.016
			GOTERM_MF_FAT	protein heterodimerization activity	3	0.0035	0.03
			GOTERM_MF_FAT	R-SMAD binding	2	0.0038	0.027
			GOTERM_MF_FAT	transcription activator activity	3	0.0053	0.033
			GOTERM_MF_FAT	transcription regulator activity	4	0.0059	0.032
316	Txnip	4	GOTERM_BP_FAT	extracellular matrix organization	10	2.5e-09	2.7e-06
317	Mfge8	4	GOTERM_BP_FAT	extracellular structure organization	10	1.3e-07	7.1e-05
318	Ifitm2	4	GOTERM_BP_FAT	collagen fibril organization	6	1.7e-07	6.1e-05
319	Tmem176b	4	GOTERM_BP_FAT	biological adhesion	14	3.4e-06	0.00091
320	Tmem176a	4	GOTERM_BP_FAT	cell adhesion	14	3.4e-06	0.00091
321	Timp2	4	GOTERM_BP_FAT	blood vessel development	9	7e-05	0.015
322	Bcam	4	GOTERM_BP_FAT	vasculature development	9	8.7e-05	0.015
323	Enpep	4	GOTERM_BP_FAT	collagen biosynthetic process	3	0.00021	0.032
324	Lpl	4	GOTERM_BP_FAT	response to wounding	11	0.00022	0.029
325	Ptp4a3	4	GOTERM_BP_FAT	response to organic substance	16	0.00036	0.042
326	Cald1	4
327	Trib2	4	GOTERM_MF_FAT	glycosaminoglycan binding	12	1e-11	2.1e-09
328	Mylk	4	GOTERM_MF_FAT	polysaccharide binding	12	4.2e-11	4.3e-09
329	Rgs5	4	GOTERM_MF_FAT	pattern binding	12	4.2e-11	4.3e-09
330	Pid1	4	GOTERM_MF_FAT	heparin binding	10	2.3e-10	1.5e-08
331	Fbn1	4	GOTERM_MF_FAT	carbohydrate binding	13	3.6e-07	1.8e-05
332	Ltbp4	4	GOTERM_MF_FAT	extracellular matrix structural constituent	6	1.3e-06	5.1e-05
333	Htra3	4	GOTERM_MF_FAT	growth factor binding	7	1.1e-05	0.00036
334	Cfh	4	GOTERM_MF_FAT	extracellular matrix binding	5	1.1e-05	0.00032
335	Aoc3	4	GOTERM_MF_FAT	calcium ion binding	15	2e-05	0.0005
336	Cygb	4	GOTERM_MF_FAT	integrin binding	5	3.9e-05	0.00087
337	Col1a2	4
338	Col6a2	4	KEGG_PATHWAY	ECM-receptor interaction	7	1.2e-05	0.00062
339	Spon2	4	KEGG_PATHWAY	Focal adhesion	9	3.1e-05	0.00077
340	Gm2a	4
341	Psmb8	4
342	S100a4	4
343	Lcp1	4
344	Coro1a	4
345	Rac2	4
346	Spn	4
347	Gda	4
348	Fcer1g	4
349	Itgb2	4
350	Bcl2a1	4
351	Cd53	4
352	Ptprc	4
353	Laptm5	4
354	Ube2c	4
355	Tuba1c	4
356	Phf11b	4
357	Cd7	4
358	Cytip	4
359	Sell	4
360	Plac8	4
361	Ptprcap	4
362	Itgb5	4
363	Ctgf	4
364	Dpep1	4
365	Clic2	4
366	C1r	4
367	Ehd2	4
368	Mgp	4
369	S100a6	4
370	Igfbp5	4
371	Pmp22	4
372	Rarres2	4
373	Fxyd1	4
374	Axl	4
375	Lhfp	4
376	Abca8a	4
377	Serpine2	4
378	Col3a1	4
379	Tpm2	4
380	Bgn	4
381	Oaf	4
382	Ppp1r14a	4
383	Fndc1	4
384	Ppic	4
385	Spon1	4
386	Loxl1	4
387	Apoe	4
388	Gsn	4
389	Gsta1	4
390	Sfrp1	4
391	Eln	4
392	Mxra8	4
393	Sod3	4
394	C1s	4
395	Lum	4
396	Col5a1	4
397	Plod2	4
398	Selenbp1	4
399	Prelp	4
400	Angptl2	4
401	Tagln	4
402	Aldh1a1	4
403	Dpt	4
404	Islr	4
405	Dcn	4
406	Lox	4
407	Col1a1	4
408	Mfap4	4
409	Fam198b	4
410	Ptgis	4
411	Ogn	4
412	Smoc2	4
413	Serpinf1	4
414	Crispld2	4
415	Thbs4	4
416	Sst	5	GOTERM_BP_FAT	circulatory system process	5	5.4e-05	0.036
417	Serpina1	5	GOTERM_BP_FAT	blood circulation	5	5.4e-05	0.036
418	Lgals2	5	GOTERM_BP_FAT	negative regulation of tissue remodeling	3	8.3e-05	0.028
419	Igfbp1	5
420	Dgkb	5
421	Cartpt	5
422	Hhex	5
423	Syt1	5
424	Tacr3	5
425	Calcb	5
426	Ifi27l2b	5
427	Cxadrl1	5
428	Caly	5
429	Meis2	5
430	Calca	5
431	Ugt1aX	5
432	Casr	5
433	Atp1b2	5
434	Cd24	5
435	Rbp1	5
436	Cabp7	5
437	Cpb2	5
438	Nnat	5
439	Crip1	6	GOTERM_BP_FAT	immune response	15	7.7e-11	6.8e-08
440	Arhgdib	6	GOTERM_BP_FAT	immunoglobulin mediated immune response	7	1.5e-08	6.8e-06
441	Notch3	6	GOTERM_BP_FAT	B cell mediated immunity	7	2e-08	5.8e-06
442	Pln	6	GOTERM_BP_FAT	lymphocyte mediated immunity	7	6.8e-08	1.5e-05
443	Il34	6	GOTERM_BP_FAT	positive regulation of immune system process	10	9.6e-08	1.7e-05
444	Cspg4	6	GOTERM_BP_FAT	adaptive immune response based on somatic recombination of immune receptors built from immunoglobulin superfamily domains	7	1.1e-07	1.6e-05
445	Vtn	6	GOTERM_BP_FAT	adaptive immune response	7	1.1e-07	1.6e-05
446	Higd1b	6	GOTERM_BP_FAT	antigen processing and presentation of exogenous peptide antigen via MHC class II	5	1.4e-07	1.7e-05
447	Pdgfrb	6	GOTERM_BP_FAT	antigen processing and presentation of peptide antigen via MHC class II	5	1.4e-07	1.7e-05
448	Abcc9	6	GOTERM_BP_FAT	immune effector process	8	2e-07	2.2e-05
449	Steap4	6	GOTERM_BP_FAT	leukocyte mediated immunity	7	2.4e-07	2.3e-05
450	Ccdc80	6	GOTERM_BP_FAT	antigen processing and presentation of peptide or polysaccharide antigen via MHC class II	5	2.4e-07	2.1e-05
451	Ano1	6	GOTERM_BP_FAT	antigen processing and presentation of exogenous peptide antigen	5	6.4e-07	5.1e-05
452	Igf1	6	GOTERM_BP_FAT	antigen processing and presentation of exogenous antigen	5	1.7e-06	0.00012
453	Ndufa4l2	6	GOTERM_BP_FAT	antigen processing and presentation of peptide antigen	5	1e-05	0.0007
454	Atp1a2	6	GOTERM_BP_FAT	defense response	9	6.9e-05	0.0043
455	Cd9	6	GOTERM_BP_FAT	positive regulation of immune response	6	0.00014	0.0079
456	Sncg	6	GOTERM_BP_FAT	antigen processing and presentation	5	0.00021	0.011
457	Myl9	6	GOTERM_BP_FAT	regulation of phosphorylation	8	0.00047	0.024
458	Acta2	6	GOTERM_BP_FAT	regulation of phosphorus metabolic process	8	0.00059	0.028
459	Ndrg2	6	GOTERM_BP_FAT	regulation of phosphate metabolic process	8	0.00059	0.028
460	Tinagl1	6	GOTERM_BP_FAT	negative regulation of cell differentiation	6	0.00088	0.04
461	Slc12a2	6
462	Ifi27	6	KEGG_PATHWAY	Antigen processing and presentation	7	5.6e-06	0.00035
463	RGD1564664	6	KEGG_PATHWAY	Systemic lupus erythematosus	7	6.4e-06	0.0002
464	Sat1	6	KEGG_PATHWAY	Hematopoietic cell lineage	6	5e-05	0.001
465	Inpp5d	6	KEGG_PATHWAY	Asthma	4	0.00023	0.0036
466	Rgs10	6	KEGG_PATHWAY	Viral myocarditis	5	0.0011	0.014
467	Ifngr1	6	KEGG_PATHWAY	Intestinal immune network for IgA production	4	0.0017	0.017
468	Sh3bgrl3	6	KEGG_PATHWAY	Graft-versus-host disease	4	0.0024	0.021
469	Rhog	6	KEGG_PATHWAY	Allograft rejection	4	0.0027	0.021
470	C1qa	6	KEGG_PATHWAY	Type I diabetes mellitus	4	0.0039	0.026
471	Rgs2	6	KEGG_PATHWAY	Autoimmune thyroid disease	4	0.0041	0.025
472	Tpm4	6	KEGG_PATHWAY	Cell adhesion molecules (CAMs)	5	0.0076	0.042
473	Rac1	6
474	Cotl1	6
475	Prr13	6
476	RT1-Db1	6
477	Cd74	6
478	Cd37	6
479	RT1-Da	6
480	MGC112715	6
481	Ctss	6
482	Aif1	6
483	RT1-DMb	6
484	RT1-DMa	6
485	Clec4a1	6
486	Alox5ap	6
487	Cd4	6
488	Tyrobp	6
489	Ccl6	6
490	C1qc	6
491	C1qb	6
492	Glipr1	6
493	Mpeg1	6
494	Clec7a	6
495	Csf1r	6
496	Cybb	6
497	Lyz2	6
498	Ptpn6	7	GOTERM_BP_FAT	glucose metabolic process	11	2.9e-07	0.00036
499	Ftl1	7	GOTERM_BP_FAT	regulation of cellular localization	13	3.3e-07	0.00021
500	Pabpc1	7	GOTERM_BP_FAT	regulation of secretion	12	7.4e-07	0.00031
501	Actn4	7	GOTERM_BP_FAT	hexose metabolic process	11	1.1e-06	0.00034
502	Sec14l1	7	GOTERM_BP_FAT	regulation of hormone secretion	8	1.6e-06	0.00042
503	Il6st	7	GOTERM_BP_FAT	monosaccharide metabolic process	11	3.3e-06	0.00069
504	Vamp8	7	GOTERM_BP_FAT	positive regulation of transport	11	3.6e-06	0.00064
505	Ost4	7	GOTERM_BP_FAT	response to glucose stimulus	7	8.8e-06	0.0014
506	Atp6ap2	7	GOTERM_BP_FAT	response to monosaccharide stimulus	7	1.2e-05	0.0017
507	Actn1	7	GOTERM_BP_FAT	response to hexose stimulus	7	1.2e-05	0.0017
508	Akt1	7	GOTERM_BP_FAT	positive regulation of insulin secretion	5	2.6e-05	0.0033
509	Rab10	7	GOTERM_BP_FAT	response to carbohydrate stimulus	7	3.2e-05	0.0037
510	Tmem109	7	GOTERM_BP_FAT	regulation of insulin secretion	6	3.4e-05	0.0036
511	Gaa	7	GOTERM_BP_FAT	response to organic substance	19	3.8e-05	0.0037
512	Klhdc10	7	GOTERM_BP_FAT	regulation of peptide secretion	6	5.6e-05	0.0051
513	Syndig1l	7	GOTERM_BP_FAT	positive regulation of peptide secretion	5	6.1e-05	0.0052
514	Frzb	7	GOTERM_BP_FAT	secretion by cell	9	7.5e-05	0.0059
515	Nsg1	7	GOTERM_BP_FAT	establishment of protein localization	14	8.3e-05	0.0062
516	Ctsa	7	GOTERM_BP_FAT	glycogen metabolic process	5	9.8e-05	0.0069
517	Npdc1	7	GOTERM_BP_FAT	cellular glucan metabolic process	5	9.8e-05	0.0069
518	Cltc	7	GOTERM_BP_FAT	glucan metabolic process	5	9.8e-05	0.0069
519	Nedd4	7	GOTERM_BP_FAT	pancreas development	5	0.00015	0.0099
520	Eif3a	7	GOTERM_BP_FAT	positive regulation of secretion	7	0.00015	0.0096
521	Tagln2	7	GOTERM_BP_FAT	energy reserve metabolic process	5	0.00016	0.0099
522	LOC679038	7	GOTERM_BP_FAT	positive regulation of hormone secretion	5	0.00022	0.012
523	Copa	7	GOTERM_BP_FAT	cellular polysaccharide metabolic process	5	0.00028	0.015
524	Cacna2d1	7	GOTERM_BP_FAT	protein transport	13	0.00031	0.016
525	Atp2a2	7	GOTERM_BP_FAT	carbohydrate transport	5	0.00042	0.021
526	Stxbp1	7	GOTERM_BP_FAT	secretion	9	0.00044	0.021
527	Wnt4	7	GOTERM_BP_FAT	protein localization	14	0.00045	0.021
528	Magt1	7	GOTERM_BP_FAT	response to nutrient levels	9	0.00063	0.028
529	Surf4	7	GOTERM_BP_FAT	regulation of hormone levels	7	0.00068	0.029
530	Pkm	7	GOTERM_BP_FAT	energy derivation by oxidation of organic compounds	6	0.00078	0.033
531	Ostc	7	GOTERM_BP_FAT	response to cytokine stimulus	6	0.00096	0.039
532	Nsg2	7	GOTERM_BP_FAT	glucose transport	4	0.00097	0.038
533	Ociad2	7	GOTERM_BP_FAT	insulin secretion	4	0.00097	0.038
534	Syt13	7	GOTERM_BP_FAT	response to extracellular stimulus	9	0.00099	0.037
535	Ffar1	7	GOTERM_BP_FAT	hexose transport	4	0.0011	0.039
536	Spock2	7	GOTERM_BP_FAT	monosaccharide transport	4	0.0012	0.042
537	Il1r1	7
538	Papss2	7	KEGG_PATHWAY	Maturity onset diabetes of the young	6	1.7e-06	0.00016
539	Mdh1	7
540	Igf2r	7
541	Elavl4	7
542	Ptprj	7
543	Gria2	7
544	Mlxipl	7
545	Atp2a3	7
546	Entpd3	7
547	Rwdd4	7
548	Col27a1	7
549	Rhobtb1	7
550	Sec23b	7
551	Hspa13	7
552	Slc37a4	7
553	Mlec	7
554	Cmbl	7
555	Erp29	7
556	Ndrg4	7
557	Pgm5	7
558	Ccng1	7
559	Ppp1r14b	7
560	Ccdc86	7
561	Pgrmc2	7
562	P4hb	7
563	Actr2	7
564	Fam46c	7
565	Selm	7
566	St3gal1	7
567	Pcp4	7
568	Casc4	7
569	Slc35b1	7
570	Smim14	7
571	Stt3a	7
572	Dcx	7
573	Wls	7
574	Efcab14	7
575	Srpr	7
576	Lman1	7
577	Rpn2	7
578	Saraf	7
579	Atf6	7
580	Itfg3	7
581	Mfng	7
582	Tmem206	7
583	Ripply3	7
584	Tmem123	7
585	Atf5	7
586	Dnajc3	7
587	Sdf2l1	7
588	Spcs3	7
589	Sec11c	7
590	Prlr	7
591	Igf2	7
592	Sec61a1	7
593	Uggt1	7
594	Limch1	7
595	Hyou1	7
596	Gad1	7
597	Sorl1	7
598	Fam151a	7
599	Igsf11	7
600	Trpm5	7
601	Itpkb	7
602	Nkx6-1	7
603	Gpsm1	7
604	Smap2	7
605	Trh	7
606	Cckar	7
607	Fam111a	7
608	Spock1	7
609	Abat	7
610	Ntrk2	7
611	Crispld1	7
612	Gad2	7
613	Myh10	7
614	Ppp1r1a	7
615	Ucn3	7
616	Pdx1	7
617	Msln	7
618	Hadh	7
619	Glp1r	7
620	Sytl4	7
621	LOC690918	7
622	Pcsk1	7
623	Iapp	7
624	Ero1lb	7
625	Slc2a2	7
626	Ins2	7
627	Ins1	7
628	Ubc	8	GOTERM_BP_FAT	purine ribonucleotide biosynthetic process	10	6.3e-07	0.0007
629	Ubr4	8	GOTERM_BP_FAT	ribonucleotide biosynthetic process	10	8.2e-07	0.00046
630	Srrm2	8	GOTERM_BP_FAT	purine ribonucleoside triphosphate biosynthetic process	9	2.2e-06	0.00081
631	Arf5	8	GOTERM_BP_FAT	purine ribonucleotide metabolic process	10	2.3e-06	0.00065
632	Vcp	8	GOTERM_BP_FAT	ribonucleoside triphosphate biosynthetic process	9	2.3e-06	0.00052
633	Dctn1	8	GOTERM_BP_FAT	purine nucleoside triphosphate biosynthetic process	9	2.3e-06	0.00052
634	Perp	8	GOTERM_BP_FAT	nucleoside triphosphate biosynthetic process	9	2.7e-06	0.0005
635	Lgals3bp	8	GOTERM_BP_FAT	generation of precursor metabolites and energy	12	3.1e-06	0.00049
636	Utrn	8	GOTERM_BP_FAT	ribonucleotide metabolic process	10	3.1e-06	0.00043
637	Nptn	8	GOTERM_BP_FAT	protein localization	19	4.1e-06	0.00051
638	Hadhb	8	GOTERM_BP_FAT	purine nucleotide biosynthetic process	10	4.7e-06	0.00053
639	Atp6v1e1	8	GOTERM_BP_FAT	protein transport	17	6.8e-06	0.00069
640	Pfn2	8	GOTERM_BP_FAT	purine ribonucleoside triphosphate metabolic process	9	7e-06	0.00065
641	Ufc1	8	GOTERM_BP_FAT	ion transmembrane transport	7	7.3e-06	0.00063
642	Cd164	8	GOTERM_BP_FAT	ribonucleoside triphosphate metabolic process	9	7.4e-06	0.00059
643	Tmed2	8	GOTERM_BP_FAT	establishment of protein localization	17	7.7e-06	0.00057
644	Arhgap1	8	GOTERM_BP_FAT	purine nucleoside triphosphate metabolic process	9	9.3e-06	0.00065
645	Gsto1	8	GOTERM_BP_FAT	transmembrane transport	9	9.9e-06	0.00065
646	Tusc3	8	GOTERM_BP_FAT	nucleoside triphosphate metabolic process	9	1.4e-05	0.00085
647	Phyh	8	GOTERM_BP_FAT	proton transport	7	1.8e-05	0.0011
648	Rnf10	8	GOTERM_BP_FAT	hydrogen transport	7	2e-05	0.0011
649	Atp6v0d1	8	GOTERM_BP_FAT	oxidative phosphorylation	7	2.1e-05	0.0011
650	Atp1a1	8	GOTERM_BP_FAT	nucleotide biosynthetic process	10	2.4e-05	0.0012
651	Nucb2	8	GOTERM_BP_FAT	nucleobase, nucleoside and nucleotide biosynthetic process	10	3.1e-05	0.0015
652	Erp44	8	GOTERM_BP_FAT	nucleobase, nucleoside, nucleotide and nucleic acid biosynthetic process	10	3.1e-05	0.0015
653	Nfs1	8	GOTERM_BP_FAT	energy coupled proton transport, down electrochemical gradient	6	3.2e-05	0.0015
654	Tmem248	8	GOTERM_BP_FAT	ATP synthesis coupled proton transport	6	3.2e-05	0.0015
655	Dad1	8	GOTERM_BP_FAT	purine nucleotide metabolic process	10	3.3e-05	0.0015
656	Fkbp2	8	GOTERM_BP_FAT	nitrogen compound biosynthetic process	12	6.3e-05	0.0027
657	Ssr3	8	GOTERM_BP_FAT	protein folding	8	6.3e-05	0.0026
658	Tmem130	8	GOTERM_BP_FAT	ATP biosynthetic process	7	0.00011	0.0044
659	Dnajb9	8	GOTERM_BP_FAT	ATP metabolic process	7	0.00025	0.0096
660	Pdia6	8	GOTERM_BP_FAT	vesicle-mediated transport	12	0.00075	0.027
661	Ddc	8
662	Manf	8	GOTERM_MF_FAT	monovalent inorganic cation transmembrane transporter activity	13	5.7e-12	1.8e-09
663	Tmed10	8	GOTERM_MF_FAT	hydrogen ion transmembrane transporter activity	12	6.7e-11	1.1e-08
664	Mif	8	GOTERM_MF_FAT	inorganic cation transmembrane transporter activity	13	4.9e-10	5.1e-08
665	Psmb5	8	GOTERM_MF_FAT	intramolecular oxidoreductase activity, interconverting keto- and enol-groups	4	1.4e-05	0.0011
666	Gpx4	8	GOTERM_MF_FAT	heme-copper terminal oxidase activity	5	2.7e-05	0.0017
667	Atp6v1f	8	GOTERM_MF_FAT	oxidoreductase activity, acting on heme group of donors	5	2.7e-05	0.0017
668	Hsp90aa1	8	GOTERM_MF_FAT	oxidoreductase activity, acting on heme group of donors, oxygen as acceptor	5	2.7e-05	0.0017
669	Serinc1	8	GOTERM_MF_FAT	cytochrome-c oxidase activity	5	2.7e-05	0.0017
670	Suclg1	8	GOTERM_MF_FAT	intramolecular oxidoreductase activity, transposing S-S bonds	3	0.00081	0.041
671	Bcap31	8	GOTERM_MF_FAT	protein disulfide isomerase activity	3	0.00081	0.041
672	Tgoln2	8
673	Sdf4	8	KEGG_PATHWAY	Huntington's disease	15	9.4e-09	8.5e-07
674	Aga	8	KEGG_PATHWAY	Oxidative phosphorylation	13	1.8e-08	8.1e-07
675	Chmp5	8	KEGG_PATHWAY	Parkinson's disease	13	2.7e-08	8.2e-07
676	Gabarapl2	8	KEGG_PATHWAY	Alzheimer's disease	12	7e-06	0.00016
677	Ppp2r1a	8	KEGG_PATHWAY	Cardiac muscle contraction	6	0.0015	0.027
678	Cox7a2	8
679	Atp5b	8
680	Rhoa	8
681	Srsf3	8
682	Ubl5	8
683	Eif5a	8
684	Hnrnpa2b1	8
685	Hspa8	8
686	Cdc42	8
687	Slc25a5	8
688	Dstn	8
689	Slc25a3	8
690	Cox6a1	8
691	Chchd2	8
692	Fth1	8
693	Gapdh	8
694	Fkbp1a	8
695	Snx3	8
696	Tma7	8
697	Gnai2	8
698	Rnf167	8
699	Uqcr11	8
700	Cox8a	8
701	Gng10	8
702	Tmem14c	8
703	Erh	8
704	Hap1	8
705	Csnk2a1	8
706	Ube2e3	8
707	Paics	8
708	Nop10	8
709	Tspan3	8
710	Prkaca	8
711	Tmem30a	8
712	Nedd8	8
713	Sec62	8
714	Pomp	8
715	Ubl3	8
716	Calr	8
717	Rab1a	8
718	Pgrmc1	8
719	Spcs2	8
720	Sub1	8
721	LOC301124	8
722	Tmbim6	8
723	Nme3	8
724	Atp5j	8
725	Ndufb4	8
726	Akr1a1	8
727	Sep15	8
728	Cox5b	8
729	Spcs1	8
730	Selk	8
731	Kdelr1	8
732	Aco2	8
733	Rab7a	8
734	Hsbp1	8
735	Lbh	8
736	Arf4	8
737	Cycs	8
738	Polr2l	8
739	Cox7b	8
740	Arf1	8
741	Eno1	8
742	RGD1562987	8
743	Vkorc1	8
744	Pgam1	8
745	Tmed9	8
746	Pdia4	8
747	C1galt1c1	8
748	Tmed7	8
749	Grb2	8
750	Syp	8
751	Sec61g	8
752	Tmem98	8
753	Emb	8
754	Ssr1	8
755	Nme2	8
756	Cmas	8
757	Tceal8	8
758	Psmb2	8
759	Sqstm1	8
760	Pdia3	8
761	Ndufa4	8
762	Bex2	8
763	Krtcap2	8
764	Sec61b	8
765	Atp5g1	8
766	Serp1	8
767	Slc3a2	8
768	Lman2	8
769	Ssr4	8
770	Cd59	9	GOTERM_BP_FAT	proton transport	7	1.6e-06	0.0017
771	LOC691807	9	GOTERM_BP_FAT	hydrogen transport	7	1.7e-06	0.00093
772	Nucb1	9	GOTERM_BP_FAT	oxidative phosphorylation	7	1.9e-06	0.00067
773	Map1lc3a	9	GOTERM_BP_FAT	ATP synthesis coupled proton transport	6	4.1e-06	0.0011
774	Gnb1	9	GOTERM_BP_FAT	energy coupled proton transport, down electrochemical gradient	6	4.1e-06	0.0011
775	Anxa5	9	GOTERM_BP_FAT	ion transmembrane transport	6	1.4e-05	0.003
776	Capzb	9	GOTERM_BP_FAT	ATP biosynthetic process	6	0.00014	0.025
777	Eif4g2	9	GOTERM_BP_FAT	purine ribonucleoside triphosphate biosynthetic process	6	0.00025	0.037
778	Laptm4a	9	GOTERM_BP_FAT	purine nucleoside triphosphate biosynthetic process	6	0.00026	0.034
779	Serf2	9	GOTERM_BP_FAT	ribonucleoside triphosphate biosynthetic process	6	0.00026	0.034
780	Ptma	9	GOTERM_BP_FAT	cellular protein localization	9	0.00026	0.031
781	Ywhaz	9	GOTERM_BP_FAT	cellular macromolecule localization	9	0.00027	0.029
782	Ybx1	9	GOTERM_BP_FAT	ATP metabolic process	6	0.00028	0.027
783	Tsc22d1	9	GOTERM_BP_FAT	nucleoside triphosphate biosynthetic process	6	0.00028	0.027
784	Ywhah	9	GOTERM_BP_FAT	purine ribonucleotide biosynthetic process	6	0.00049	0.043
785	Prss23	9	GOTERM_BP_FAT	purine ribonucleoside triphosphate metabolic process	6	0.00051	0.041
786	Pnrc1	9	GOTERM_BP_FAT	ribonucleoside triphosphate metabolic process	6	0.00053	0.039
787	Ctnnb1	9	GOTERM_BP_FAT	ribonucleotide biosynthetic process	6	0.00057	0.04
788	Gnaq	9	GOTERM_BP_FAT	purine nucleoside triphosphate metabolic process	6	0.00061	0.04
789	Ghitm	9
790	Sumo3	9	GOTERM_MF_FAT	hydrogen ion transmembrane transporter activity	9	1.1e-08	2e-06
791	Slc25a39	9	GOTERM_MF_FAT	monovalent inorganic cation transmembrane transporter activity	9	1.7e-08	1.6e-06
792	Ndfip1	9	GOTERM_MF_FAT	inorganic cation transmembrane transporter activity	9	3.1e-07	1.9e-05
793	Itgb1	9
794	Eif4a1	9	KEGG_PATHWAY	Oxidative phosphorylation	11	1.1e-08	6.7e-07
795	Dynlrb1	9	KEGG_PATHWAY	Huntington's disease	12	2.1e-08	6.2e-07
796	Rap1a	9	KEGG_PATHWAY	Parkinson's disease	10	2.3e-07	4.6e-06
797	Actr3	9	KEGG_PATHWAY	Alzheimer's disease	10	3.7e-06	5.5e-05
798	Atox1	9
799	Cct2	9
800	Ggh	9
801	Atp5f1	9
802	Tmem59	9
803	Srp14	9
804	Fis1	9
805	Atp6v1g1	9
806	Cadm1	9
807	Arg1	9
808	Cd81	9
809	Dnaja1	9
810	Arpc2	9
811	Pdap1	9
812	Mff	9
813	Ndufb2	9
814	Tecr	9
815	Prpf19	9
816	Hmgn1	9
817	Dynll2	9
818	Uqcrb	9
819	Ap2m1	9
820	Hnrnpk	9
821	Zfp706	9
822	Tomm20	9
823	Morf4l2	9
824	Ntan1	9
825	Paip2	9
826	Sumo2	9
827	Ndufa1	9
828	Atp6v0c	9
829	Ubb	9
830	Skp1	9
831	Calm3	9
832	Prdx2	9
833	Slc25a4	9
834	Naca	9
835	Atp5g3	9
836	Mtch1	9
837	Rabac1	9
838	Sod1	9
839	Atp5e	9
840	Atp5l	9
841	Ywhaq	9
842	Atp5g2	9
843	Calm2	9
844	Rnasek	9
845	Tomm7	9
846	Gabarap	9
847	Ptms	9
848	Mrfap1	9
849	Cox7c	9
850	Hint1	9
851	Gpr119	10	<no significant enrichment for GO BP or MF or KEGGpathways>
852	Pnma2	10
853	Trim35	10
854	Slc7a8	10
855	Maob	10
856	Slc38a5	10
857	Cntn1	10
858	Sphkap	10
859	Slc7a2	10
860	Slc30a8	10
861	Neurod1	10
862	Map1b	10
863	Syt7	10
864	Hmgn3	10
865	Ncam1	10
866	Aplp1	10
867	Scg3	10
868	Scgn	10
869	Celf2	10
870	Cbx6	10
871	Ssbp3	10
872	Ddb1	10
873	Stub1	10
874	Ube2d3	10
875	Ak1	10
876	Hspe1	10
877	Psenen	10
878	Atp6v0e1	10
879	Mrps33	10
880	Polr3k	10
881	Sdc4	10
882	Ndrg1	10
883	Sdc2	10
884	Pld3	10
885	Hist1h2bh	10
886	Cdh1	10
887	Pam	10
888	Scg2	10
889	Chga	10
890	Kcnj11	10
891	Sez6l2	10
892	Itfg1	10
893	Pbld1	10
894	Disp2	10
895	Arf3	10
896	Pax6	10
897	Rab3b	10
898	Ube2b	10
899	Eid1	10
900	Krt8	10
901	Gdi1	10
902	Pcbp2	10
903	Itm2c	10
904	Cox6c	10
905	Rab2a	10
906	Ndufc2	10
907	Wif1	10
908	Tspan7	10
909	LOC100910996	10
910	Prkar1a	10
911	Wbp5	10
912	Ngfrap1	10
913	Tmem132a	10
914	Camk2b	10
915	Bnip3	10
916	Pebp1	10
917	Camk2n1	10
918	Tns3	10
919	Suox	10
920	Rtn3	10
921	Ankh	10
922	Insrr	10
923	Prepl	10
924	Rap1gap2	10
925	Cacnb3	10
926	Ccnd2	10
927	Cd63	10
928	Atp1b1	10
929	Foxa2	10
930	Ptprn2	10
931	Prnp	10
932	Ptprf	10
933	Slc29a4	10
934	Lrp11	10
935	Vegfa	10
936	Atp6v1b2	10
937	Maged1	10
938	Acly	10
939	Snhg11	10
940	Cpe	10
