# Supplementary material for: End Sequence Analysis Toolkit (ESAT) expands the extractable information from single-cell RNA-seq data
Source: HighWire-hosted journal article supplement (doi:10.1101/gr.207902.116), 2016-07-28
Supplement: Supplemental_Fig_S5.pdf [file Supplemental_Fig_S5.pdf]

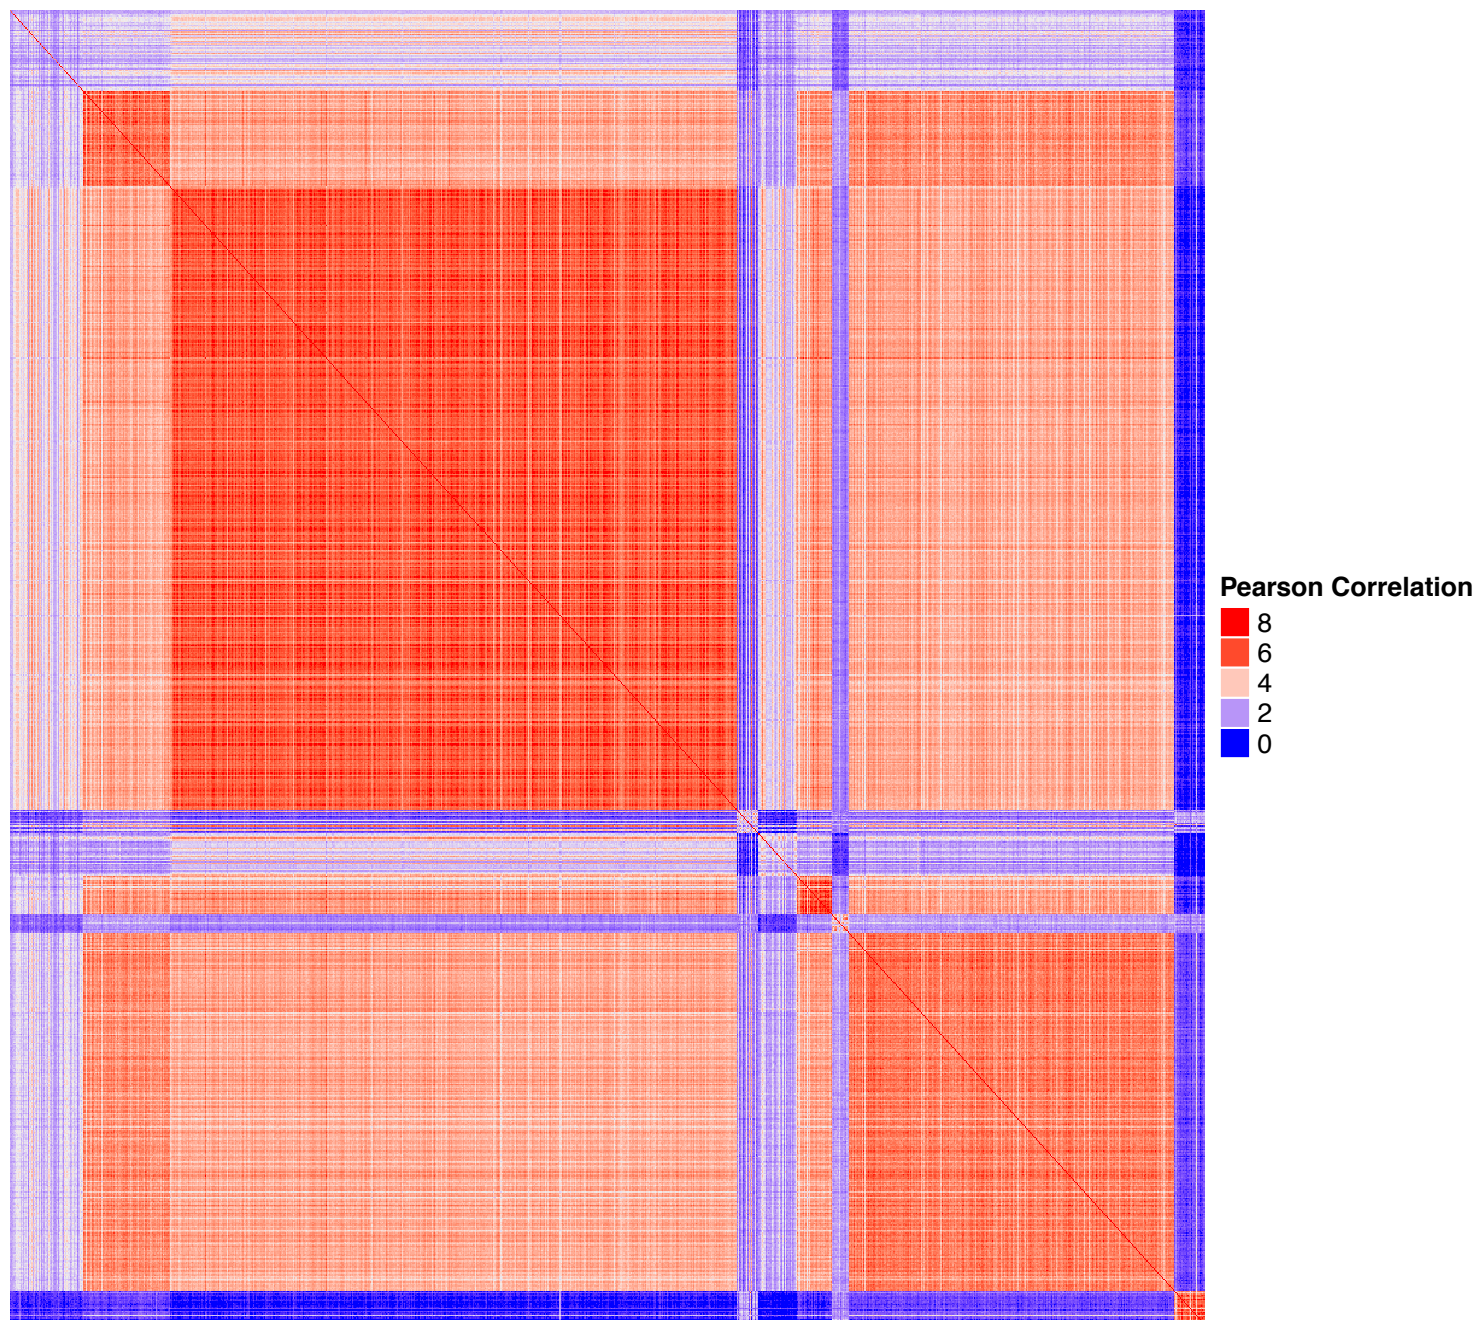

**Supplemental Fig S4. No global switch to shorter 5' TSS expression in stimulated DCs.** Boxplots of the fraction of transcripts expressing the earliest TSS for genes with detectable expression of at least two distinct 5' TSSs in unstimulated DCs (total of 26). p-values were computed using a Mann-Whitney rank sum test between the two unstimulated distributions and each of the time points shown.
