# Supplementary material for: End Sequence Analysis Toolkit (ESAT) expands the extractable information from single-cell RNA-seq data
Source: HighWire-hosted journal article supplement (doi:10.1101/gr.207902.116), 2016-07-28
Supplement: Supplemental_Fig_S7.pdf [file Supplemental_Fig_S7.pdf]

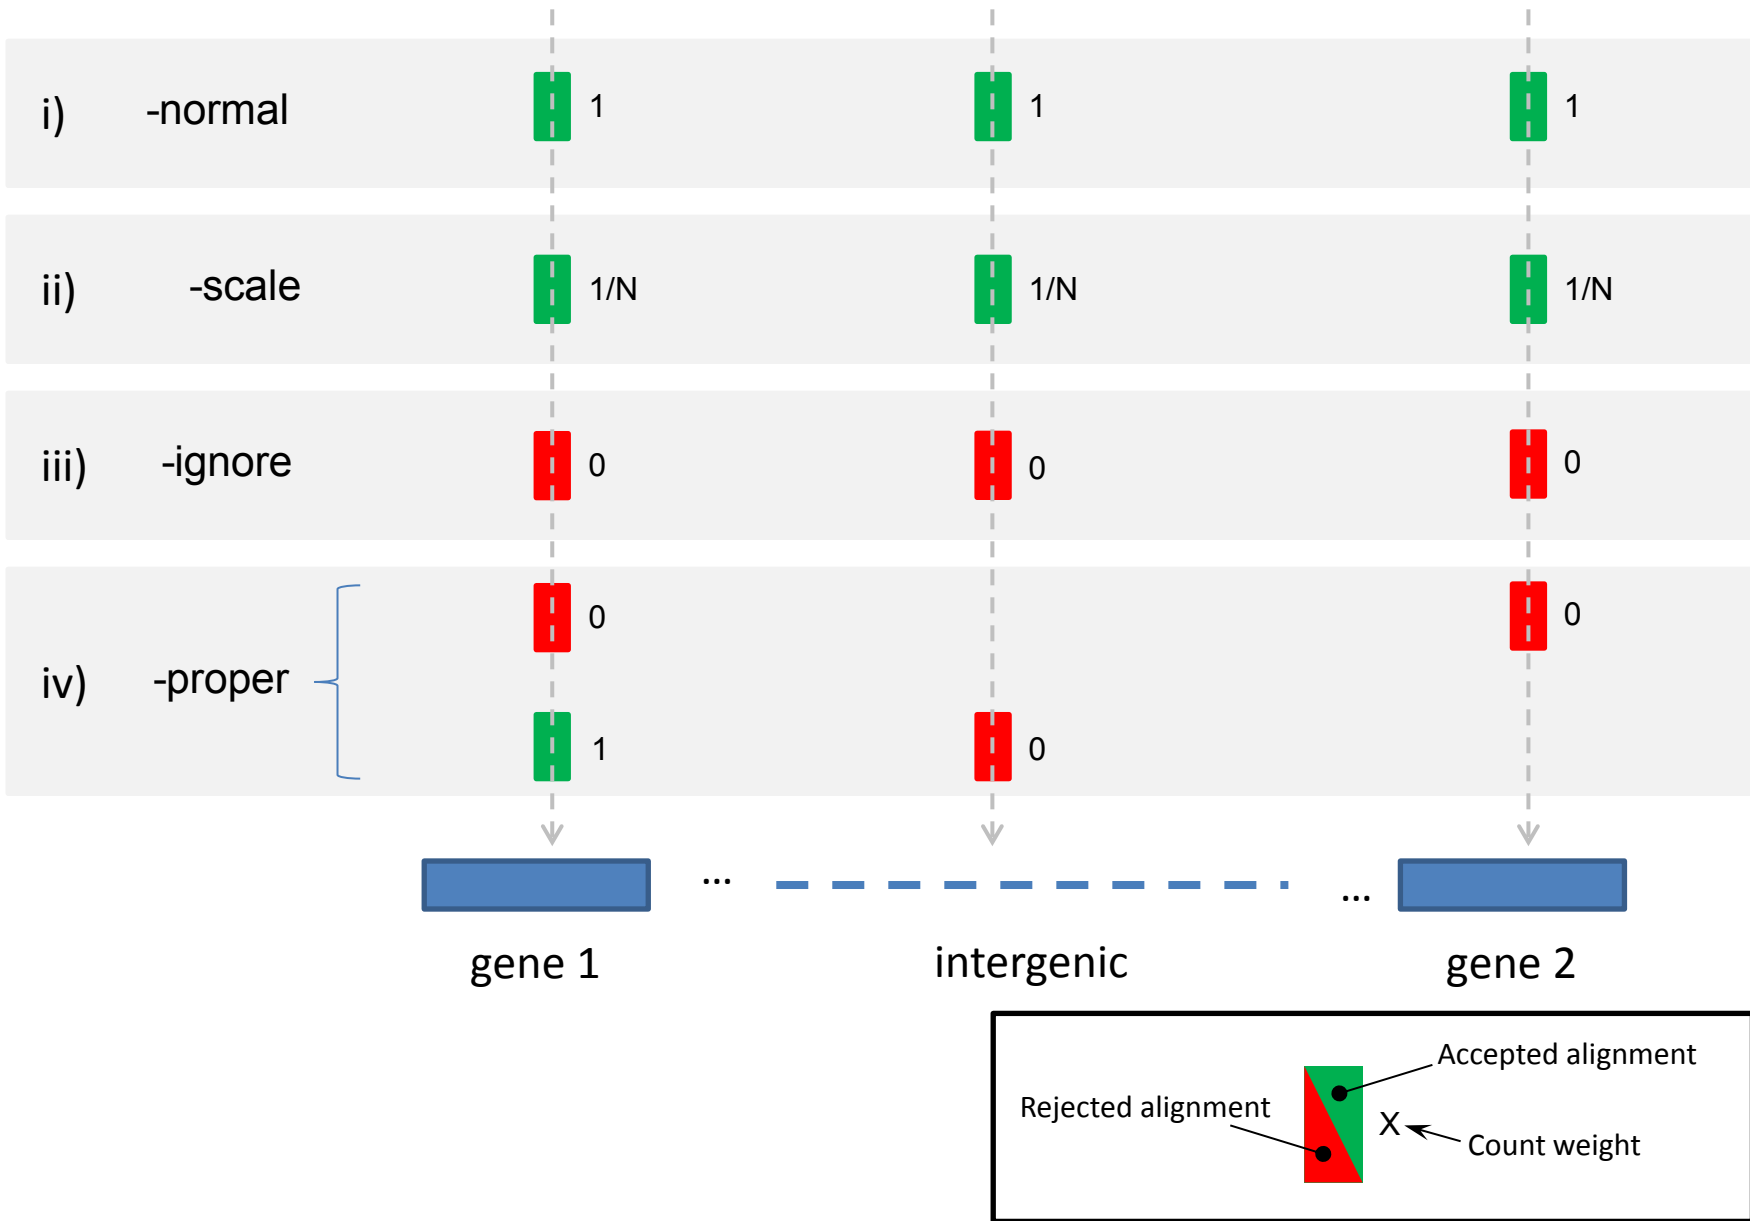

**Supplemental Fig S7. Multimapper handling method.** A) -normal counts each multimapped read with a full count. B) -scale weights each of N multimapped reads by 1/N. C) -ignore discards all multimapped reads. D) -proper multimapped reads are processed according to the algorithm described in the text.
